# Supplementary material
Source: Springer Nature journal article supplement (https://www.springermedizin.de/resource/supplementary/12936_2010_1666_MOESM5_ESM.pdf/9542312)
Supplement: MOESM5 [file 9542312]

Reported fever  
N = 501

No RDT requested  
19.6% (98/501)

RDT requested  
80.4% (403/501)

|        |               |               |
|--------|---------------|---------------|
| AM:    | 1.0% (1/98)   | <b>RDT+ 0</b> |
| AB:    | 86.8% (85/98) | <b>RDT+ 0</b> |
| AM+AB: | 1.0% (1/98)   | <b>RDT+ 0</b> |
| NT:    | 11.2% (11/98) | <b>RDT+ 0</b> |

Positive RDT result  
5.5% (22/403)

Negative RDT result  
94.5% (381/403)

|        |               |
|--------|---------------|
| AM:    | 22.7% (5/22)  |
| AB:    | 0% (0/22)     |
| AM+AB: | 77.3% (17/22) |
| NT:    | 0% (0/22)     |

|        |                 |
|--------|-----------------|
| AM:    | 1.6% (6/381)    |
| AB:    | 85.8% (327/381) |
| AM+AB: | 10.5% (40/381)  |
| NT:    | 2.1% (8/381)    |
